# Supplementary material for: Dual-color photoluminescence modulation of zero-dimensional hybrid copper halide microcrystals
Source: Royal Society of Chemistry journal article supplement (doi:10.1039/d3nr05503e), 2024-01-01
Supplement: d3nr05503e1.pdf [file d3nr05503e1.pdf]

## Supporting Information

### Dual-Color Photoluminescence Modulation of Zero-Dimensional Hybrid Copper Halide Microcrystals

Rahul Ghosh Dastidar,<sup>a</sup> Takuya Okamoto,<sup>a,b\*</sup> Kiyonori Takahashi,<sup>a,b</sup> Yuta Takano,<sup>a,b</sup>  
Chakkooth Vijayakumar,<sup>c,d</sup> Challapalli Subrahmanyam,<sup>e</sup> Vasudevanpillai Biju<sup>a,b,e\*</sup>

<sup>a</sup>Graduate School of Environmental Science, Hokkaido University, Sapporo, Hokkaido 060-0810, Japan. <sup>b</sup>Research Institute for Electronic Science, Hokkaido University, Sapporo, Hokkaido, 001-0020 Japan. <sup>c</sup>Chemical Sciences and Technology Division, CSIR-National Institute for Interdisciplinary Science and Technology (NIIST), Thiruvananthapuram 695 019, India, <sup>d</sup>Academy of Scientific and Innovative Research (AcSIR), Ghaziabad 201 002, India, <sup>e</sup>Indian Institute of Technology Hyderabad, Kandi, Telangana 502285, India.

Table S1 Single crystal X-ray diffraction (SCXRD) data and structure refinement for Bmpip(Cu<sub>2</sub>Br<sub>4</sub>).

|                                    |                                                                                                                                           |
|------------------------------------|-------------------------------------------------------------------------------------------------------------------------------------------|
| Formula                            | C <sub>20</sub> H <sub>44</sub> N <sub>2</sub> Cu <sub>2</sub> Br <sub>4</sub><br>[(Bmpip) <sub>2</sub> Cu <sub>2</sub> Br <sub>4</sub> ] |
| Formula weight                     | 759.28                                                                                                                                    |
| Temperature (K)                    | 293                                                                                                                                       |
| Radiation, wavelength (Å)          | Mo Kα, 0.71073                                                                                                                            |
| Crystal system                     | Orthorhombic                                                                                                                              |
| Space group, Z, Z'                 | P <sub>bca</sub> (68), 8, 1                                                                                                               |
| α/°, β/°, γ/°                      | 90, 90, 90                                                                                                                                |
| Unit cell parameters               | a = 13.8255 (Å)<br>b = 12.0429 (Å)<br>c = 17.0850 (Å)                                                                                     |
| Volume/Å <sup>3</sup>              | 2844.64                                                                                                                                   |
| Density (g/cm <sup>3</sup> )       | 1.773                                                                                                                                     |
| 2θ range for the data collection/° | 2.384-30.723                                                                                                                              |
| Reflections collected              | 20287                                                                                                                                     |
| Independent reflections            | 3713                                                                                                                                      |
| Restraints/parameters              | 0/129                                                                                                                                     |
| Goodness-of-fit on F <sup>2</sup>  | 1.040                                                                                                                                     |
| Final R indexes [1 < 2σ (I)]       | R <sub>1</sub> = 0.0432, wR <sub>2</sub> = 0.0716                                                                                         |
| Final R indexes [all data]         | R <sub>1</sub> = 0.0824, wR <sub>2</sub> = 0.0803                                                                                         |

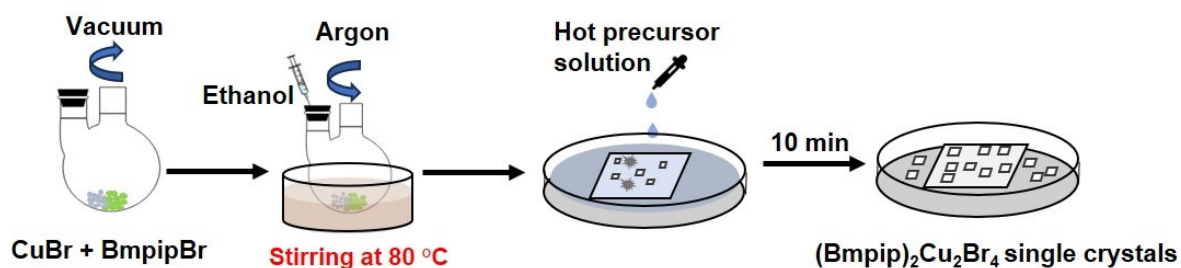

Fig. S1 (Bmpip)<sub>2</sub>Cu<sub>2</sub>Br<sub>4</sub> microcrystal (MC) preparation method.

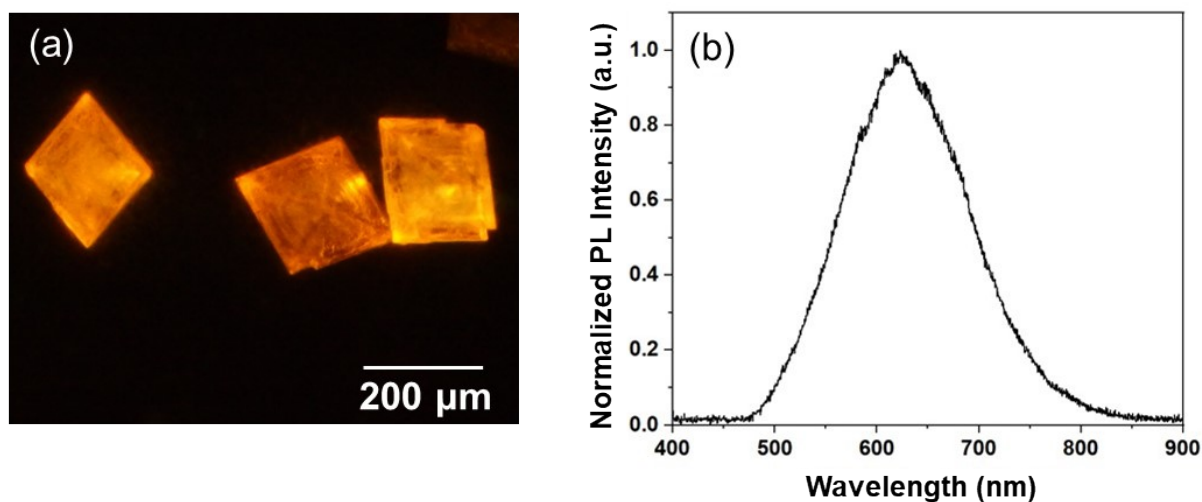

Fig. S2 (a) A photoluminescence (PL) image and (b) a PL spectrum of (Bmpip)<sub>2</sub>Cu<sub>2</sub>Br<sub>4</sub> MCs showing an intense red emission with a faint yellow emission ( $\lambda_{\text{ex}} = 404 \text{ nm}$ ).

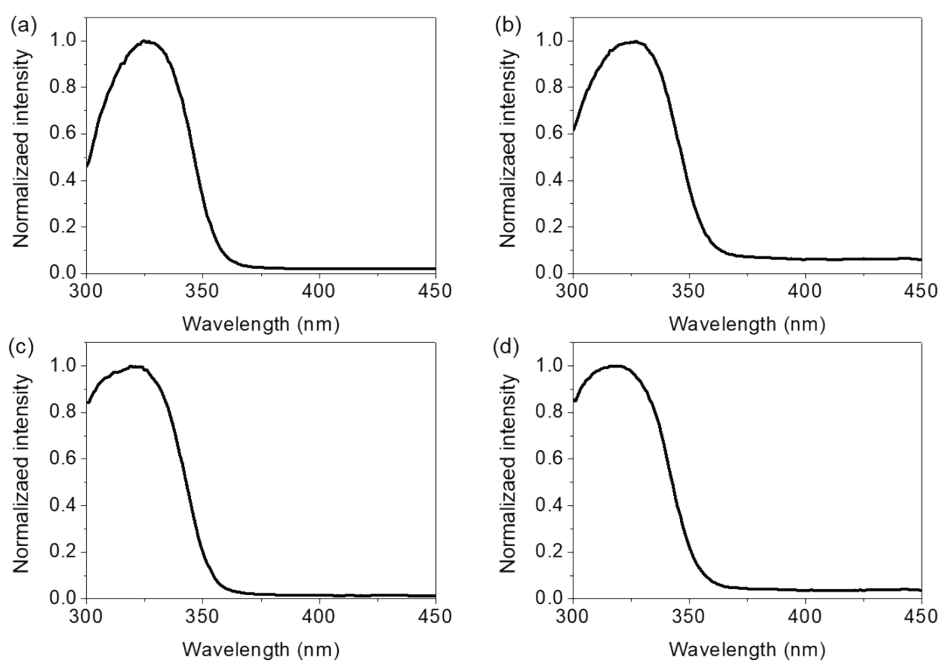

Fig. S3 PLE spectra (a,c: 600 nm; b,d, 540 nm) of (a,b) the (Bmpip)<sub>2</sub>Cu<sub>2</sub>Br<sub>4</sub> MCs prepared on a borosilicate glass plate and (c,d) an ITO-coated glass plate.

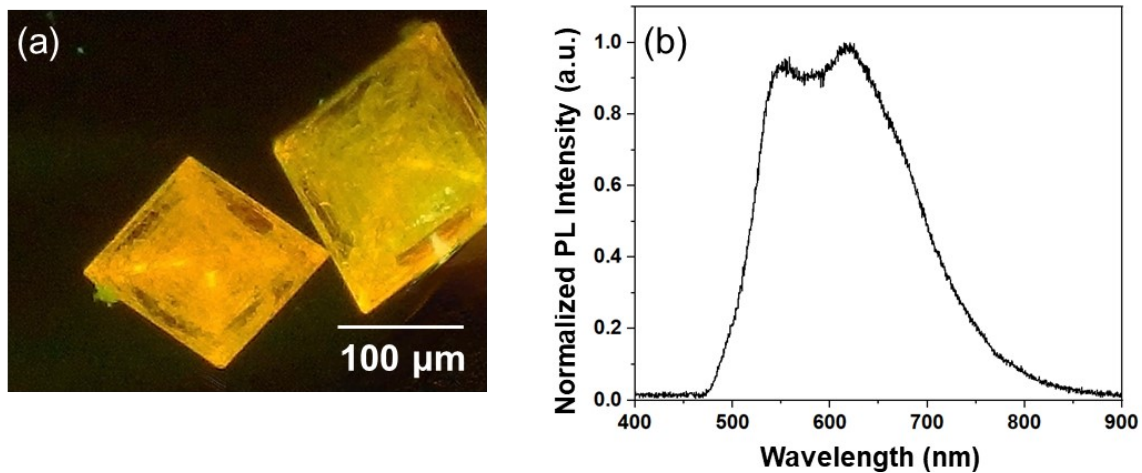

Fig. S4 (a) A PL image and (b) a PL spectrum of (Bmpip)<sub>2</sub>Cu<sub>2</sub>Br<sub>4</sub> MCs prepared with small amount (10 μL) of water ( $\lambda_{\text{ex}} = 404$  nm).

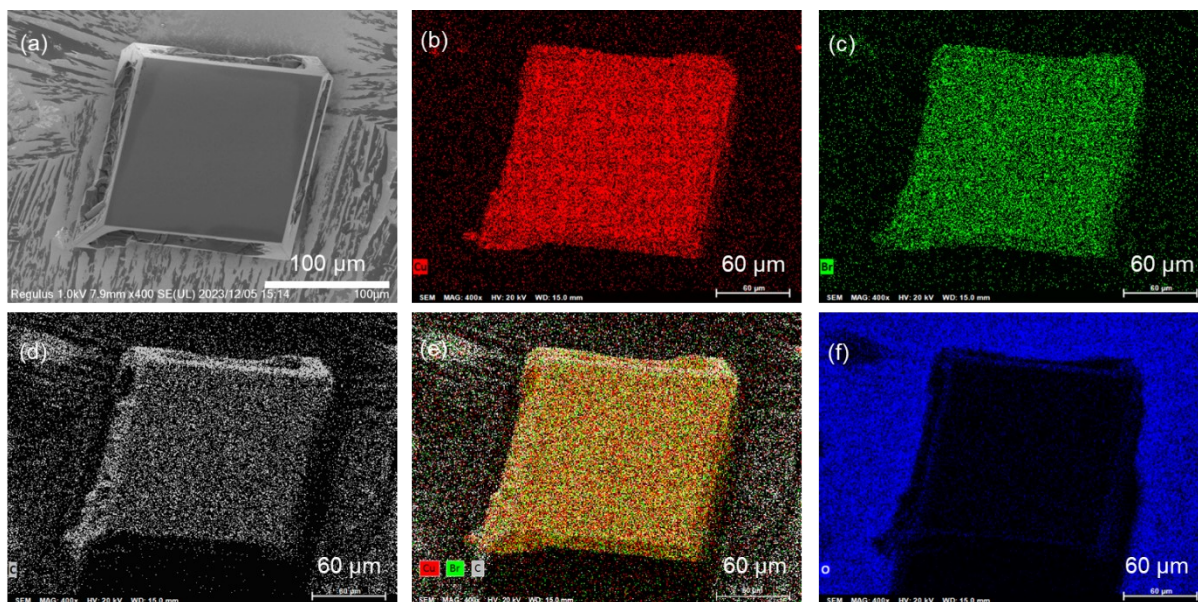

Fig. S5 (a) An SEM image, (b-f) EDX elemental maps of (b) copper, (c) bromide, (d) carbon, (e) an overlaid image of copper, bromide, and carbon, (f) oxygen of the MC prepared on a borosilicate glass plate.

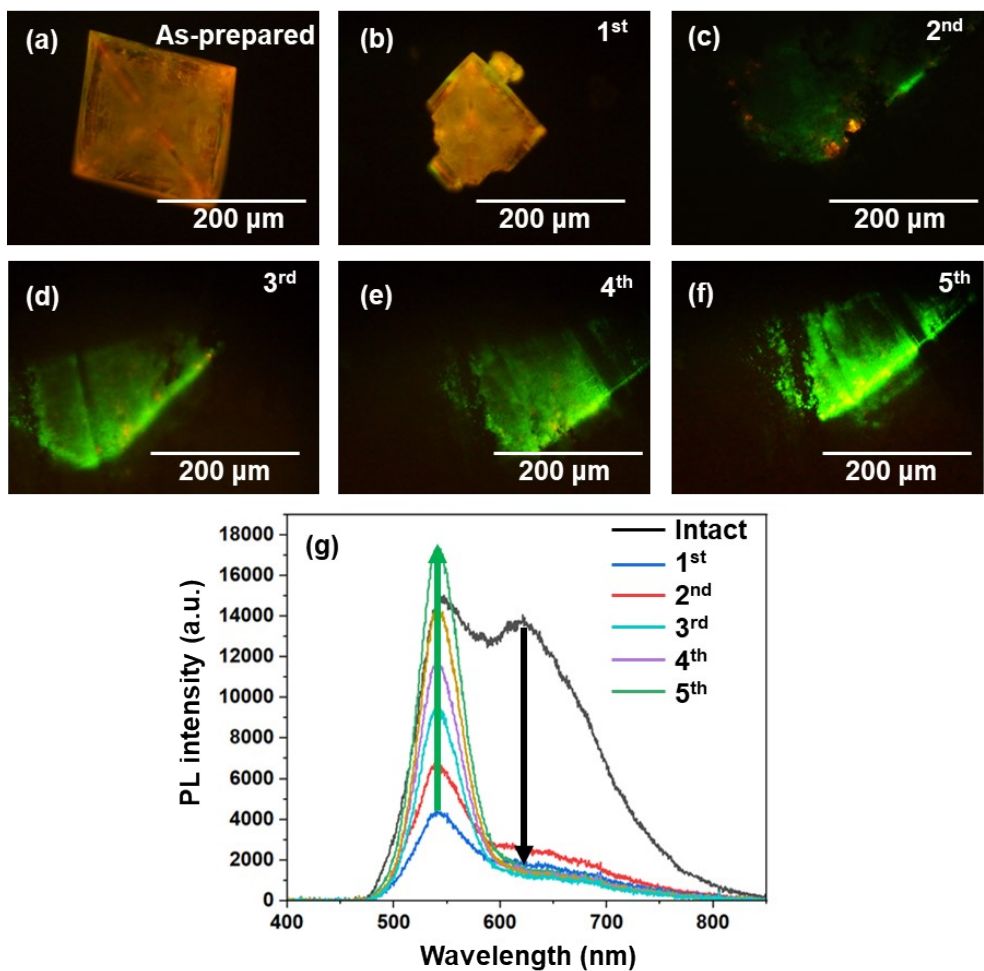

Fig. S6 (a-f) PL images and (g) PL spectral changes of the  $(\text{Bmpip})_2\text{Cu}_2\text{Br}_4$  MCs prepared on a borosilicate glass plate during five times cracking and powdering using a stainless-steel spatula ( $\lambda_{\text{ex}} = 404 \text{ nm}$ ).

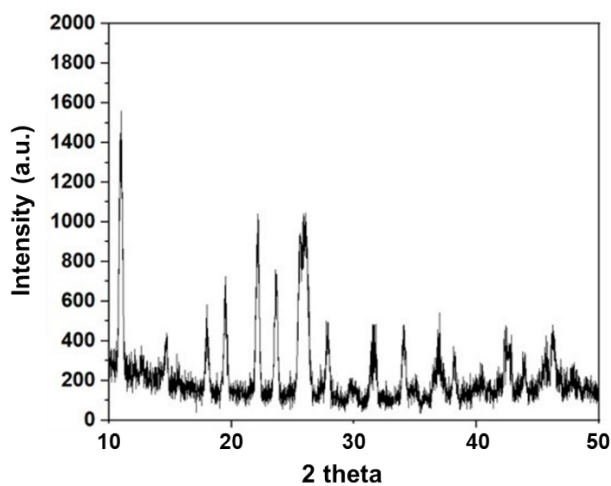

Fig. S7 A powder-XRD pattern of  $(\text{Bmpip})_2\text{Cu}_2\text{Br}_4$  MCs prepared on a borosilicate glass plate after powdering it using a stainless-steel spatula.

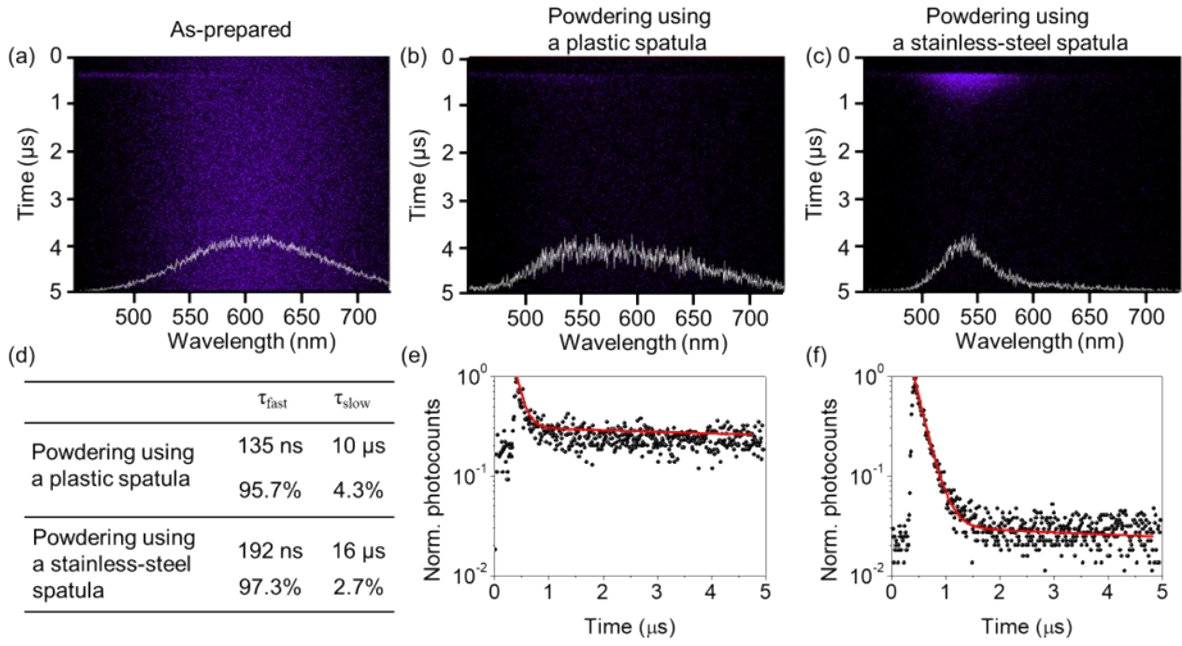

Fig. S8 Photocount map of the  $(\text{Bmpip})_2\text{Cu}_2\text{Br}_4$  MCs prepared on a borosilicate glass plate (a) before and (b,c) after powdering using (b) a plastic spatula and (c) a stainless-steel spatula ( $\lambda_{ex} = 405$  nm). The dense purple dots indicate detected photons from the sample. a, b and c are corresponding to Fig. 4b, 4d and 4e, respectively. The short decay below 500 nm in a is scattering and fluorescence from the glass substrate. The white lines in the photocount maps indicate the normalized PL spectra. (d) PL lifetime components of the decay curves in e and f. (e,f) PL decay curves of the MCs after powdering using (e) a plastic spatula and (f) a stainless-steel spatula. The red lines in e and f indicate biexponential fitting curves.
